# Supplementary material for: Bone marrow stroma cells derived from mononuclear cells at diagnosis as a source of germline control DNA for determination of somatic mutations in acute myeloid leukemia
Source: PubMed Central journal article supplement (PMC5678220; doi:10.1038/bcj.2017.93), 2017-10-06

Supplementary figure 1.

Sample ID: UPN1 AML-blasts  
Assay: IDH1\_R132H

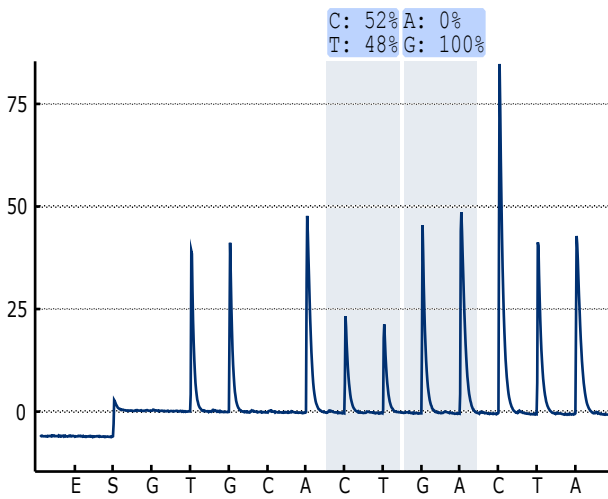

Sample ID: UPN1 BMS  
Assay: IDH1\_R132H

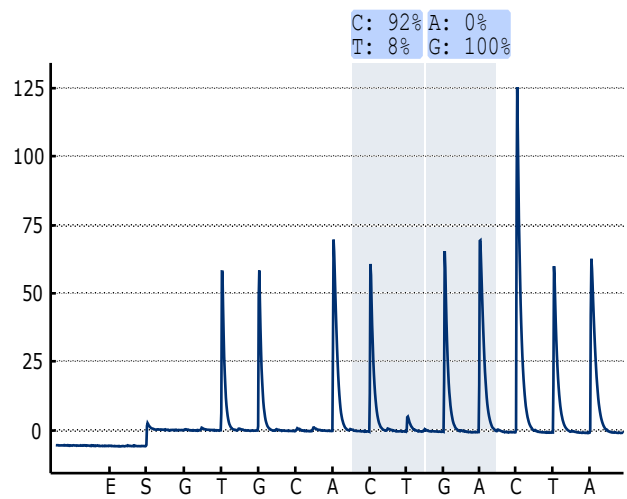

Sample ID: UPN1 AML-blasts  
Assay: FLT3\_g.28608217-28608217insC

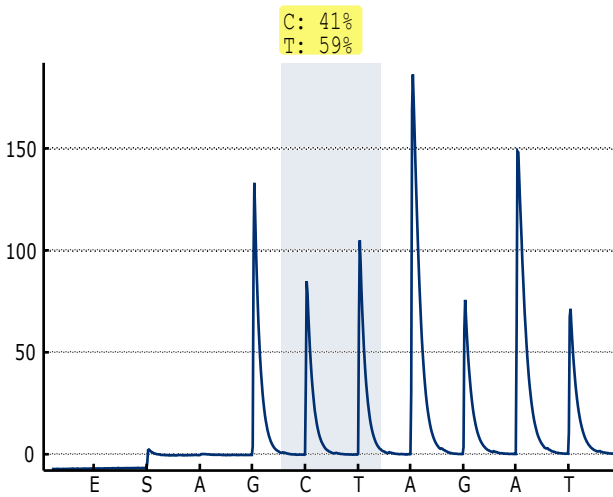

Sample ID: UPN1 BMS  
Assay: FLT3\_g.28608217-28608217insC

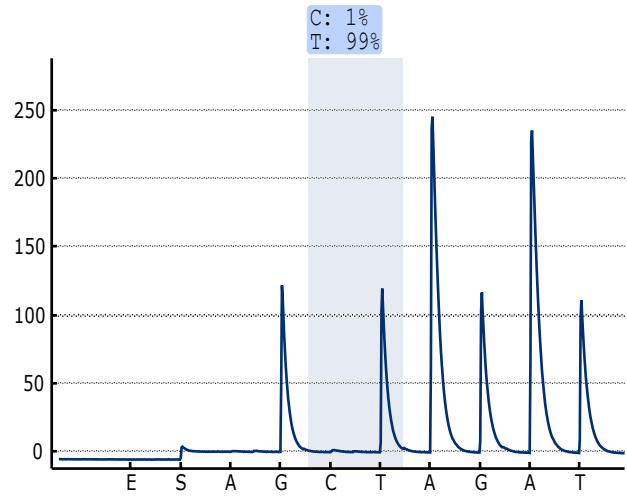

Sample ID: UPN2 AML-blasts  
Assay: EZH2\_E196\*

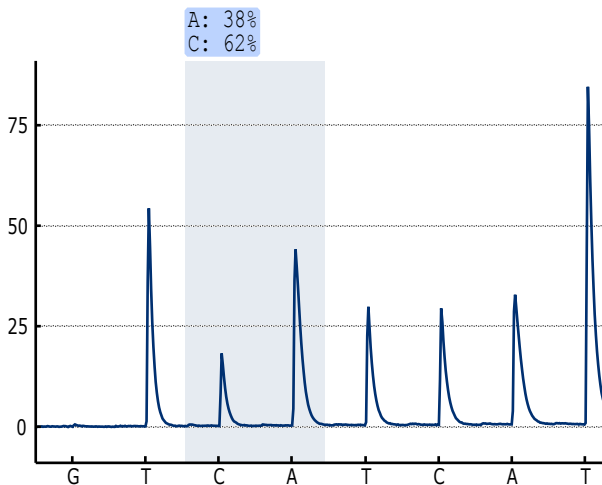

Sample ID: UPN2 BMS  
Assay: EZH2\_E196\*

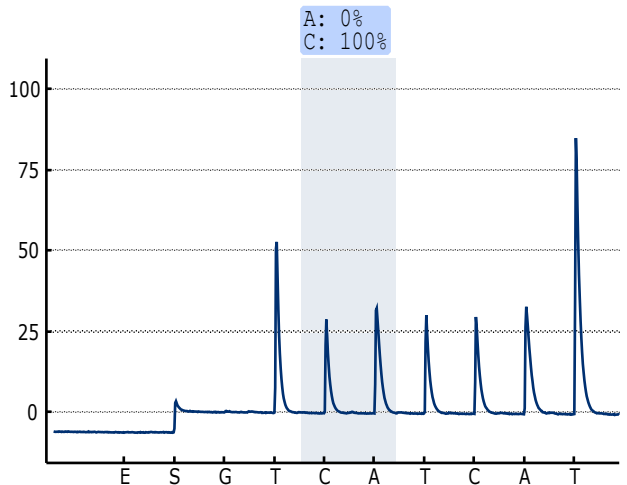

Sample ID: UPN2 AML-blasts  
Assay: FLT3\_D385Y

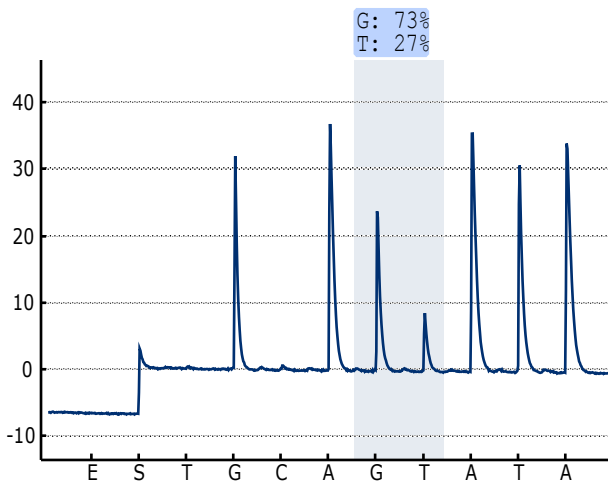

Sample ID: UPN2 BMS  
Assay: FLT3\_D385Y

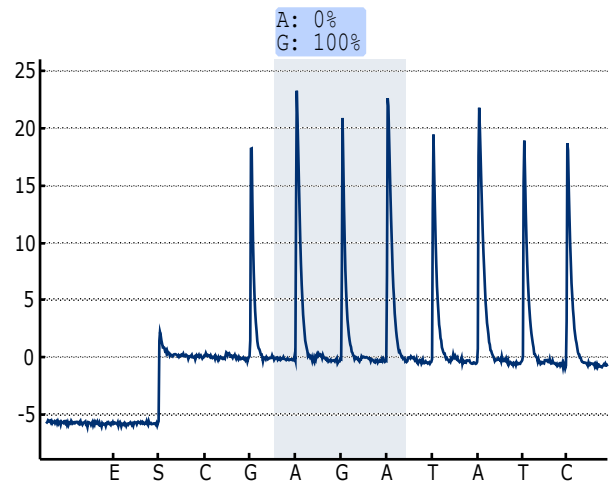

Sample ID: UPN3 AML-blasts  
Assay: PEPN11\_E76K

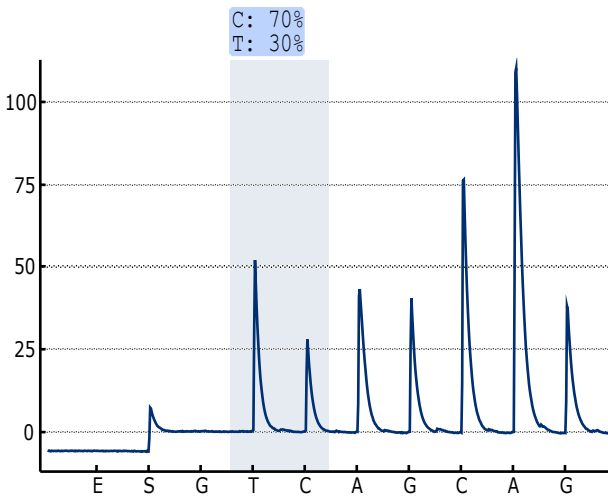

Sample ID: UPN3 BMS  
Assay: PEPN11\_E76K

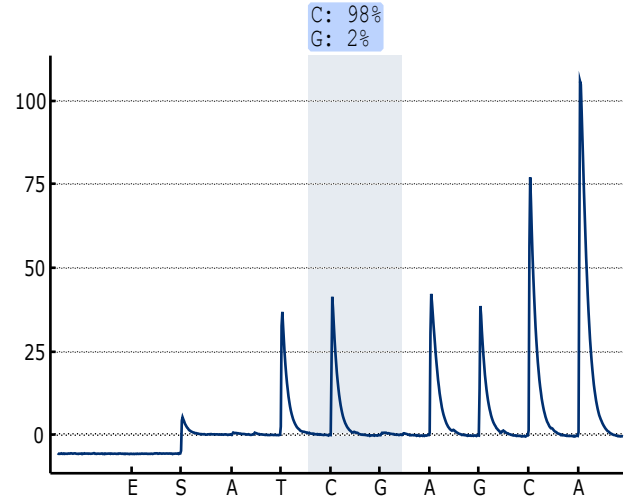

Sample ID: UPN3 AML-blasts  
Assay: SF3B1\_R625G

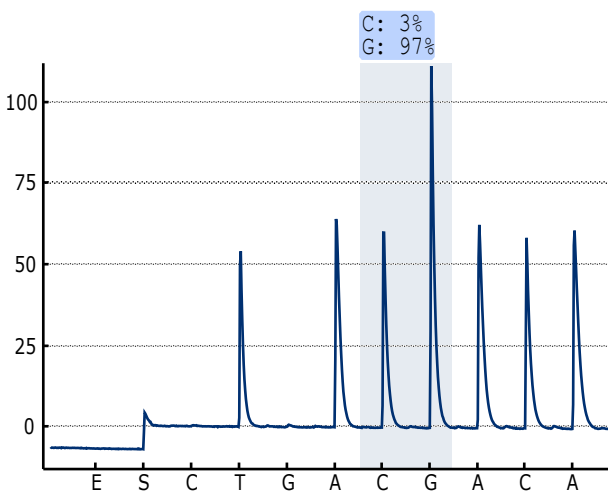

Sample ID: UPN3 BMS  
Assay: SF3B1\_R625G

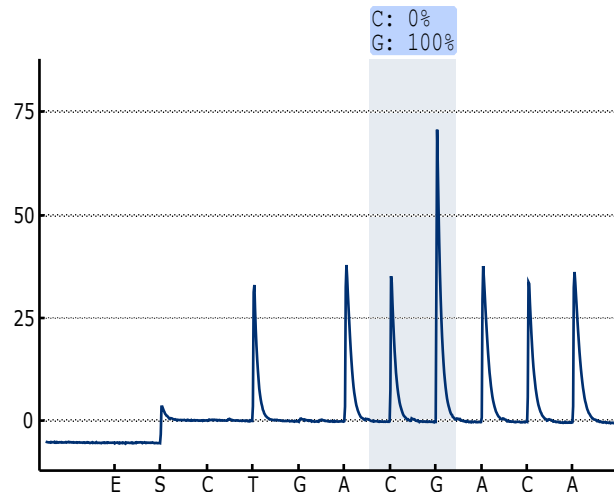

Sample ID: UPN4 AML-blasts  
Assay: KRAS\_G12V

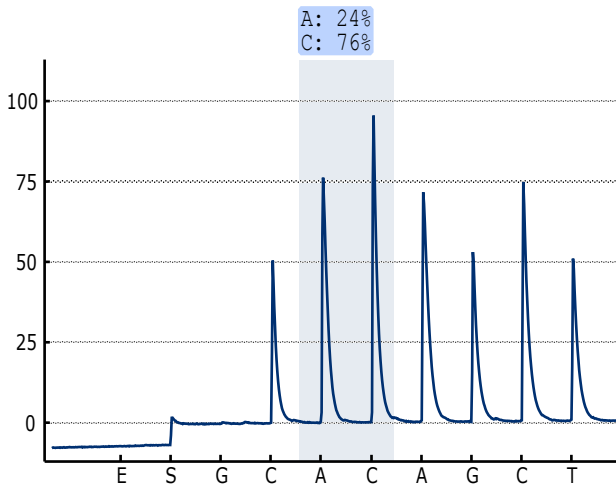

Sample ID: UPN4 BMS  
Assay: KRAS\_G12DV

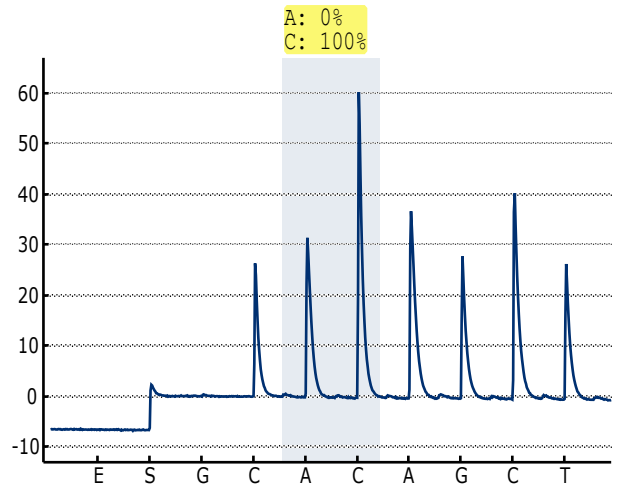

Sample ID: UPN4 AML-blasts  
Assay: TP53\_H193R

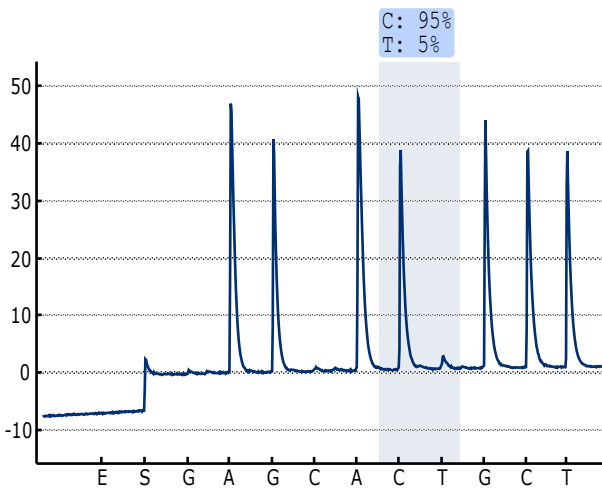

Sample ID: UPN4 BMS  
Assay: TP53\_H193R

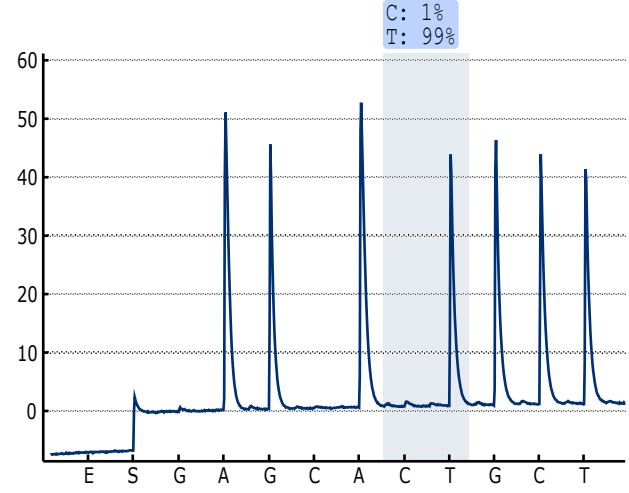

Sample ID: UPN5 AML-blasts  
Assay: NRAS\_G12D

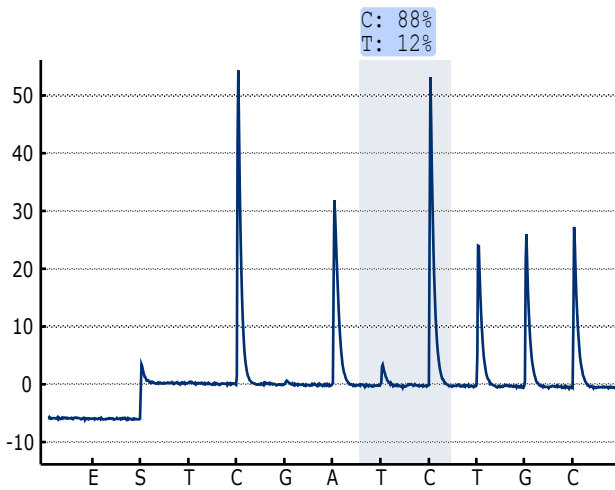

Sample ID: UPN5 BMS  
Assay: NRAS\_G12D

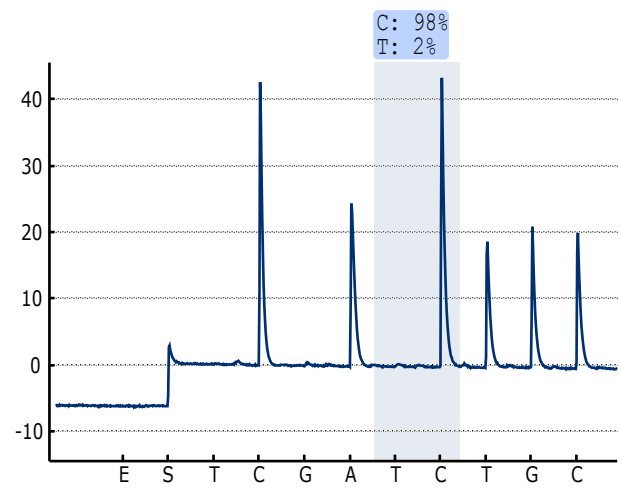

Sample ID: UPN5 AML-blasts  
Assay: DNMT3A\_R882H

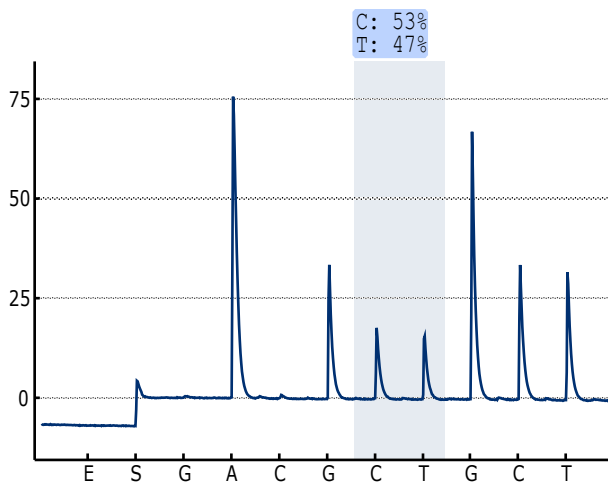

Sample ID: UPN5 BMS  
Assay: DNMT3A\_R882H

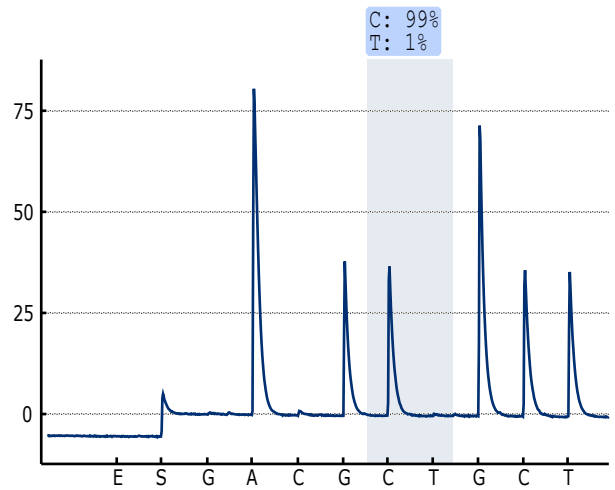

Sample ID: UPN6 AML-blasts  
Assay: TET2\_R1214W

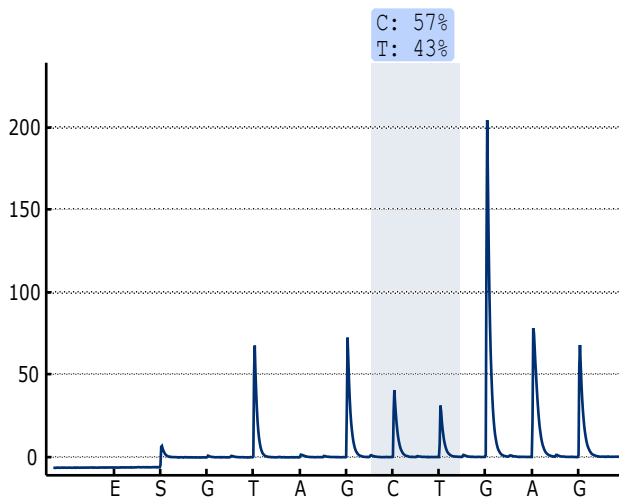

Sample ID: UPN6 BMS  
Assay: TET2\_R1214W

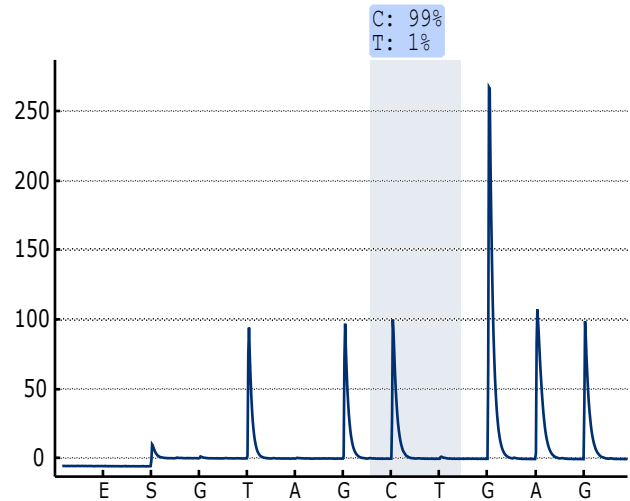

Sample ID: UPN6 AML-blasts  
Assay: RUNX1\_R166\*

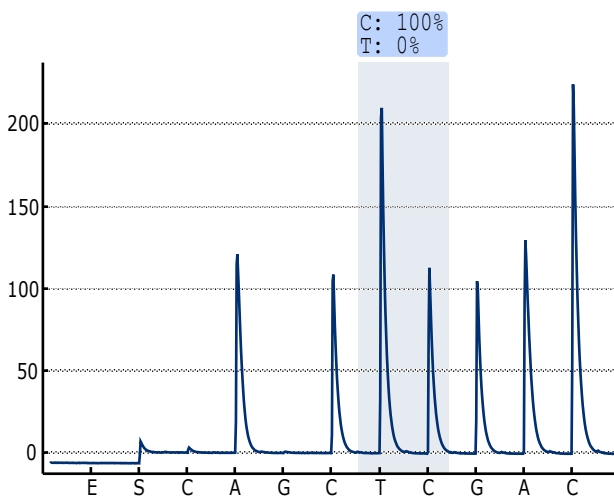

Sample ID: UPN6 BMS  
Assay: RUNX1\_R166\*

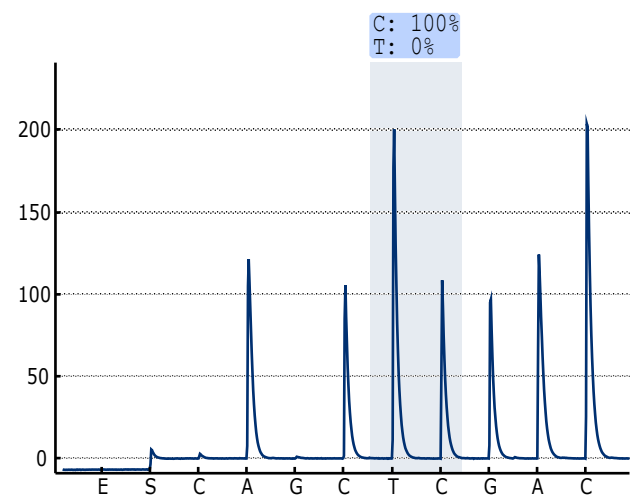

Sample ID: UPN6 AML-blasts  
Assay: NRAS\_Q61K

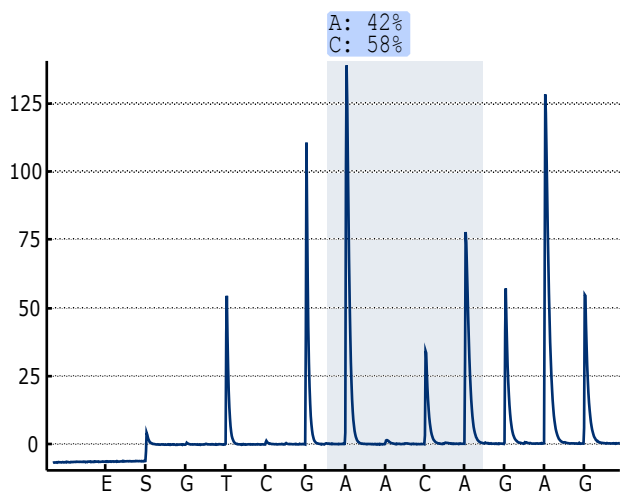

Sample ID: UPN6 BMS  
Assay: NRAS\_Q61K

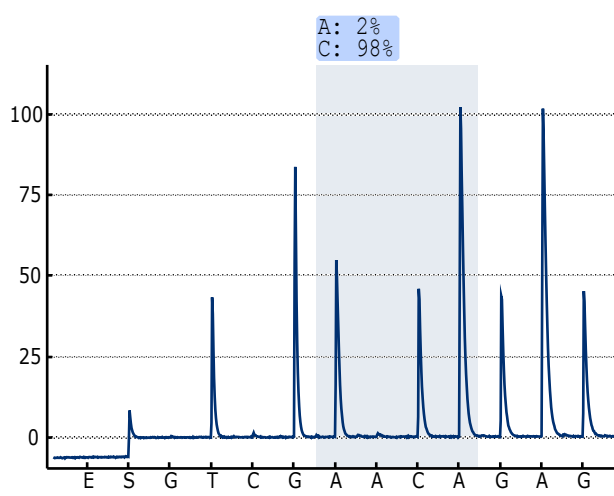

Supplement: bcj201793x2.pdf [file bcj201793x2.pdf]
